# Supplementary material for: Discrimination of Diabetes Mellitus Patients and Healthy Individuals Based on Volatile Organic Compounds (VOCs): Analysis of Exhaled Breath and Urine Samples by Using E-Nose and VE-Tongue
Source: MDPI journal article supplement (doi:10.3390/chemosensors11060350), 2023-06-19
Supplement: s1 [file s1]

## Supplementary Materials:

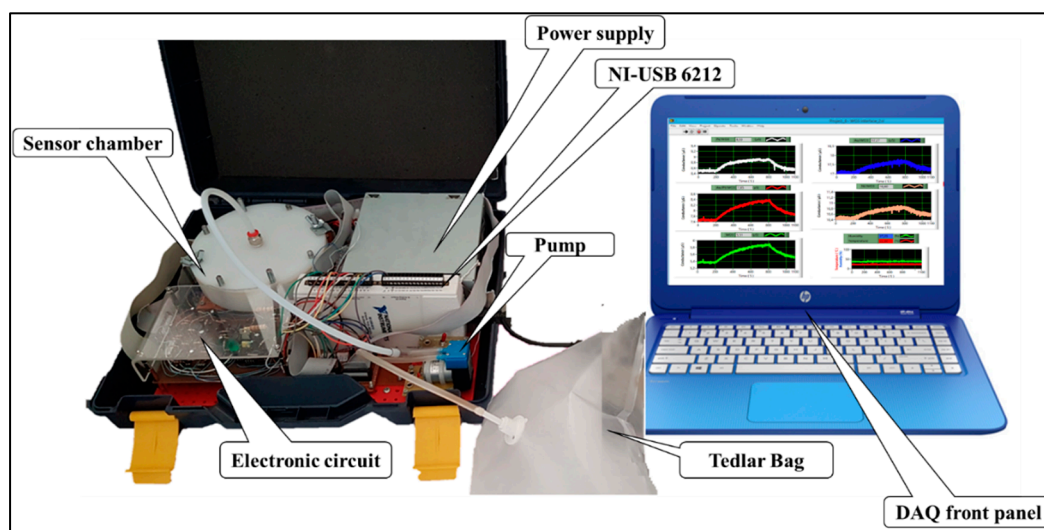

**Figure S1.** Experimental set-up of the e-nose dedicated to the analysis of breath samples.

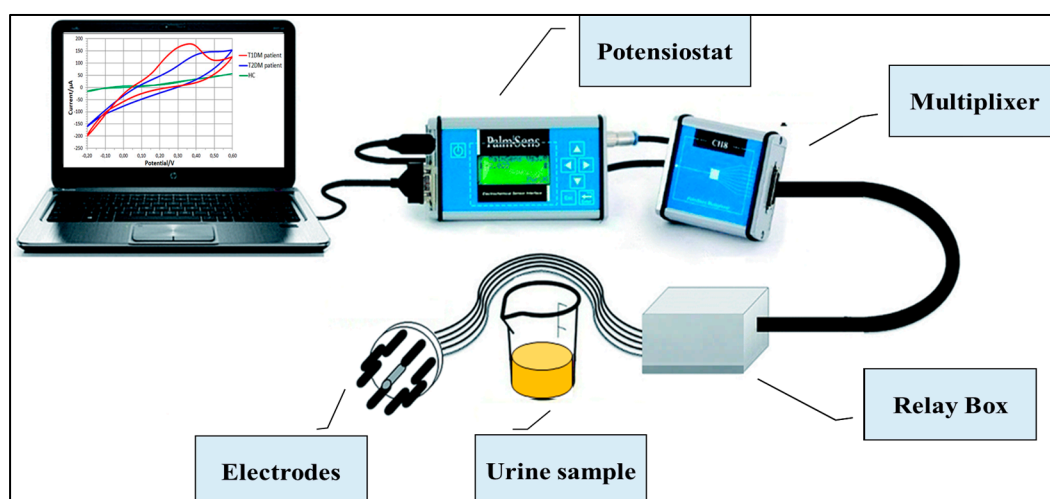

**Figure S2.** Experimental set-up of the VE-tongue dedicated to the analysis of urine samples.
